# Supplementary material for: Surface snow bromide and nitrate at Eureka, Canada in early spring and implications for polar boundary layer chemistry
Source: Copernicus journal article supplement (doi:10.5194/egusphere-2023-1446), 2023-08-31
Supplement: Supplementary file 1 [file egusphere-2023-1446-supplement.pdf]

Supplementary materials

Surface snow bromide and nitrate at Eureka, Canada in early spring and implications for polar boundary layer chemistry

Xin Yang<sup>1</sup>, Kimberly Strong<sup>2</sup>, Alison S. Criscitiello<sup>3</sup>, Marta Santos-Garcia<sup>1\*</sup>, Kristof Bognar<sup>2\*\*</sup>, Xiaoyi Zhao<sup>4</sup>, Pierre Fogal<sup>2</sup>, Kaley A. Walker<sup>2</sup>, Sara M., Morris<sup>5</sup>, and Peter Effertz<sup>6,7</sup>

5 <sup>1</sup>British Antarctic Survey, Natural Environment Research Council, Cambridge, UK

<sup>2</sup>Department of Physics, University of Toronto, Toronto, ON, Canada

<sup>3</sup>Department of Earth and Atmospheric Sciences, University of Alberta, Edmonton, Alberta, Canada

<sup>4</sup>Air Quality Research Division, Environment and Climate Change Canada, Toronto, ON, Canada

<sup>5</sup>NOAA Earth System Research Laboratories, Physical Sciences Laboratory, Boulder, CO, USA

10 <sup>6</sup>Cooperative Institute for Research in Environmental Science - CU Boulder, Boulder, CO, USA

<sup>7</sup>NOAA Earth System Research Laboratories, Global Monitoring Laboratory, Boulder, CO, USA

\*Now at School of Geosciences, University of Edinburgh, Edinburgh, UK

\*\*Now at 3v Geomatics Inc., Vancouver, BC, Canada

Correspondence to: Xin Yang (xinyang55@bas.ac.uk)

15

Table S1. Overview of relative standard deviations of duplicate analyses for 2019 samples (n=36), and average limits of detection (LOD)<sup>a</sup> and limits of quantification (LOQ)<sup>b</sup>. The units are  $\mu\text{M}$ .

|                                    | MSA   | Cl <sup>-</sup> | Br <sup>-</sup>    | NO <sub>3</sub> <sup>-</sup> | SO <sub>4</sub> <sup>=</sup> | Na <sup>+</sup> | K <sup>+</sup> | Mg <sup>2+</sup> |
|------------------------------------|-------|-----------------|--------------------|------------------------------|------------------------------|-----------------|----------------|------------------|
| Relative Standard deviation        | -     | 0.034           | 0.023              | 0.037                        | 0.011                        | 0.109           | 0.263          | 0.391            |
| LOD <sup>a</sup> ( $\mu\text{M}$ ) | 0.070 | 0.367           | 0.200 <sup>c</sup> | 0.484 <sup>d</sup>           | 0.531                        | 0.696           | 1.228          | 0.741            |
| LOQ <sup>b</sup> ( $\mu\text{M}$ ) | 0.260 | 1.185           | 0.238 <sup>c</sup> | 0.484 <sup>d</sup>           | 1.780                        | 2.305           | 4.092          | 2.510            |

<sup>a</sup> LOD = 3x standard deviation of filter blank average peak area. <sup>b</sup> LOQ = 10x standard deviation of filter blank average peak area. <sup>c</sup> and <sup>d</sup> Br<sup>-</sup> and NO<sub>3</sub><sup>-</sup> did not have filter blank background and therefore LOD and LOQ were defined as 3x and 10x the minimum measurable peak area, respectively.

20

Table S2. Statistical results for the ionic analysis of the 2018 snow samples at the Sea ice, Onshore, PEARL and Creek sites.

The units are  $\mu\text{M}$ .

|                                      |                                      | 2018               |       |       |        |                |         |         |         |
|--------------------------------------|--------------------------------------|--------------------|-------|-------|--------|----------------|---------|---------|---------|
|                                      |                                      | 0-0.5cm            |       |       |        | Column average |         |         |         |
|                                      |                                      | n                  | mean  | std   | median | n              | mean    | std     | median  |
| Sea ice                              | [Br <sup>-</sup> ]                   | 36                 | 0.23  | 0.10  | 0.24   | 80             | 10.74   | 8.52    | 7.63    |
|                                      | [Cl <sup>-</sup> ]                   | 30                 | 12.55 | 6.15  | 12.66  | 80             | 5822.27 | 5166.40 | 3131.57 |
|                                      | [Ca <sup>2+</sup> ]                  | 33                 | 2.42  | 2.62  | 1.20   | 80             | 63.43   | 51.40   | 28.23   |
|                                      | [F <sup>-</sup> ]                    | 30                 | 0.09  | 0.03  | 0.10   | 73             | 1.16    | 0.40    | 1.21    |
|                                      | [K <sup>+</sup> ]                    | 30                 | 1.64  | 0.04  | 1.62   | 80             | 55.35   | 41.15   | 28.47   |
|                                      | [MSA]                                | 26                 | 0.07  | 0.05  | 0.06   | 2              | 0.32    | 0.04    | 0.32    |
|                                      | [Acetate]                            | 34                 | 15.16 | 9.92  | 16.26  | 24             | 91.49   | 9.74    | 89.94   |
|                                      | [Formate]                            | 26                 | 6.02  | 0.08  | 5.98   | 28             | 4.90    | 2.36    | 4.04    |
|                                      | [NH <sub>4</sub> <sup>+</sup> ]      | 34                 | 0.43  | 0.24  | 0.38   | 53             | 5.11    | 3.88    | 3.96    |
|                                      | [Oxalate]                            | 34                 | 3.69  | 2.54  | 4.40   | 41             | 8.24    | 7.69    | 2.27    |
|                                      | [Mg <sup>2+</sup> ]                  | 32                 | 1.86  | 0.77  | 1.84   | 81             | 338.56  | 259.62  | 172.65  |
|                                      | [Na <sup>+</sup> ]                   | 32                 | 3.18  | 2.00  | 3.29   | 75             | 1437.78 | 722.12  | 1120.23 |
|                                      | [NO <sub>3</sub> <sup>-</sup> ]      | 33                 | 3.17  | 1.00  | 3.32   | 87             | 4.95    | 2.75    | 4.66    |
|                                      | [SO <sub>4</sub> <sup>2-</sup> ]     | 34                 | 0.73  | 0.38  | 0.57   | 69             | 163.62  | 97.14   | 176.53  |
|                                      | nss-[Br <sup>-</sup> ]               | 36                 | 0.22  | 0.10  | 0.23   | 82             | 5.69    | 6.79    | 3.71    |
|                                      | nss-[SO <sub>4</sub> <sup>2-</sup> ] | 32                 | 0.49  | 0.26  | 0.43   | 70             | 87.17   | 115.13  | 66.67   |
|                                      | Onshore                              | [Br <sup>-</sup> ] | 33    | 0.27  | 0.11   | 0.30           | 60      | 0.33    | 0.23    |
| [Cl <sup>-</sup> ]                   |                                      | 27                 | 11.46 | 6.69  | 11.41  | 66             | 122.82  | 70.75   | 106.86  |
| [Ca <sup>2+</sup> ]                  |                                      | 32                 | 6.28  | 5.23  | 3.31   | 66             | 16.11   | 7.74    | 18.14   |
| [F <sup>-</sup> ]                    |                                      | 8                  | 0.05  | 0.05  | 0.05   | 63             | 0.13    | 0.06    | 0.11    |
| [K <sup>+</sup> ]                    |                                      | 33                 | 0.57  | 0.65  | 0.23   | 65             | 3.40    | 2.04    | 3.65    |
| [MSA]                                |                                      | 4                  | 0.13  | 0.06  | 0.12   | 34             | 0.01    | 0.01    | 0.01    |
| [Acetate]                            |                                      | 32                 | 7.26  | 0.75  | 7.27   | 56             | 1.21    | 0.31    | 1.18    |
| [Formate]                            |                                      | 31                 | 1.39  | 0.27  | 1.39   | 58             | 0.75    | 0.27    | 0.71    |
| [NH <sub>4</sub> <sup>+</sup> ]      |                                      | 30                 | 1.33  | 0.35  | 1.25   | 57             | 1.12    | 0.32    | 1.08    |
| [Oxalate]                            |                                      | 33                 | 0.19  | 0.05  | 0.20   | 73             | 0.50    | 0.34    | 0.41    |
| [Mg <sup>2+</sup> ]                  |                                      | 26                 | 1.40  | 1.19  | 0.96   | 66             | 19.22   | 12.31   | 18.77   |
| [Na <sup>+</sup> ]                   |                                      | 27                 | 7.17  | 4.75  | 7.26   | 65             | 79.70   | 56.94   | 71.62   |
| [NO <sub>3</sub> <sup>-</sup> ]      |                                      | 34                 | 3.22  | 1.45  | 2.83   | 66             | 3.91    | 0.73    | 3.97    |
| [SO <sub>4</sub> <sup>2-</sup> ]     |                                      | 33                 | 1.55  | 1.12  | 0.97   | 64             | 6.20    | 1.78    | 6.35    |
| nss-[Br <sup>-</sup> ]               |                                      | 33                 | 0.23  | 0.09  | 0.24   | 61             | 0.18    | 0.14    | 0.16    |
| nss-[SO <sub>4</sub> <sup>2-</sup> ] |                                      | 23                 | 0.51  | 0.36  | 0.34   | 65             | 1.11    | 3.12    | 0.97    |
| PEARL                                |                                      | [Br <sup>-</sup> ] | 8     | 0.08  | 0.06   | 0.05           | 37      | 0.03    | 0.02    |
|                                      | [Cl <sup>-</sup> ]                   | 8                  | 25.22 | 20.67 | 14.22  | 38             | 7.70    | 5.46    | 7.01    |
|                                      | [Ca <sup>2+</sup> ]                  | 8                  | 1.41  | 1.48  | 1.09   | 42             | 1.91    | 0.95    | 1.65    |
|                                      | [F <sup>-</sup> ]                    | 6                  | 0.06  | 0.03  | 0.06   | 24             | 0.03    | 0.02    | 0.02    |
|                                      | [K <sup>+</sup> ]                    | 7                  | 0.36  | 0.29  | 0.25   | 37             | 0.19    | 0.08    | 0.20    |
|                                      | [MSA]                                | 6                  | 0.01  | 0.00  | 0.01   | 37             | 0.18    | 0.07    | 0.16    |
|                                      | [Acetate]                            | 7                  | 5.90  | 0.16  | 5.84   | 36             | 1.53    | 1.39    | 1.06    |
|                                      | [Formate]                            | 8                  | 6.34  | 3.15  | 8.03   | 39             | 0.51    | 0.10    | 0.56    |
|                                      | [NH <sub>4</sub> <sup>+</sup> ]      | 2                  | 1.50  | 0.54  | 1.50   | 43             | 0.72    | 0.60    | 0.47    |
|                                      | [Oxalate]                            | 8                  | 0.91  | 0.46  | 1.16   | 37             | 0.08    | 0.03    | 0.09    |
|                                      | [Mg <sup>2+</sup> ]                  | 7                  | 1.13  | 1.77  | 0.36   | 38             | 0.99    | 0.62    | 0.79    |
|                                      | [Na <sup>+</sup> ]                   | 7                  | 5.92  | 13.78 | 0.65   | 37             | 6.69    | 4.93    | 5.68    |
|                                      | [NO <sub>3</sub> <sup>-</sup> ]      | 8                  | 2.07  | 0.66  | 1.86   | 37             | 0.71    | 0.26    | 0.66    |
|                                      | [SO <sub>4</sub> <sup>2-</sup> ]     | 8                  | 0.94  | 0.40  | 0.87   | 41             | 1.75    | 0.89    | 1.64    |
|                                      | nss-[Br <sup>-</sup> ]               | 8                  | 0.06  | 0.03  | 0.05   | 36             | 0.01    | 0.01    | 0.01    |
|                                      | nss-[SO <sub>4</sub> <sup>2-</sup> ] | 7                  | 0.50  | 0.54  | 0.70   | 44             | 1.06    | 0.78    | 1.01    |
|                                      | Creek                                | [Br <sup>-</sup> ] | 12    | 0.06  | 0.01   | 0.06           | 27      | 0.63    | 0.58    |
| [Cl <sup>-</sup> ]                   |                                      | 12                 | 7.53  | 3.22  | 6.82   | 27             | 0.93    | 104.62  | 162.47  |
| [Ca <sup>2+</sup> ]                  |                                      | 13                 | 6.26  | 4.26  | 5.43   | 22             | 9.16    | 6.93    | 8.31    |
| [F <sup>-</sup> ]                    |                                      | 12                 | 0.03  | 0.02  | 0.03   | 27             | 0.25    | 0.16    | 0.21    |
| [K <sup>+</sup> ]                    |                                      | 11                 | 0.13  | 0.05  | 0.11   | 22             | 0.56    | 0.40    | 0.47    |
| [MSA]                                |                                      | 10                 | 0.24  | 0.14  | 0.28   | 18             | 0.01    | 0.01    | 0.01    |
| [Acetate]                            |                                      | 12                 | 6.59  | 0.71  | 6.45   | 23             | 5.87    | 0.05    | 5.86    |
| [Formate]                            |                                      | 13                 | 1.34  | 0.54  | 1.22   | 27             | 5.75    | 3.31    | 8.03    |
| [NH <sub>4</sub> <sup>+</sup> ]      |                                      | 13                 | 1.67  | 0.57  | 1.55   | 20             | 1.10    | 1.30    | 0.14    |
| [Oxalate]                            |                                      | 13                 | 0.17  | 0.02  | 0.16   | 27             | 0.97    | 0.41    | 1.17    |
| [Mg <sup>2+</sup> ]                  |                                      | 13                 | 1.44  | 1.12  | 1.23   | 23             | 5.14    | 5.06    | 3.96    |
| [Na <sup>+</sup> ]                   |                                      | 12                 | 5.22  | 2.32  | 4.55   | 23             | 15.76   | 13.32   | 14.08   |
| [NO <sub>3</sub> <sup>-</sup> ]      |                                      | 13                 | 1.45  | 0.52  | 1.46   | 25             | 4.15    | 0.75    | 4.03    |
| [SO <sub>4</sub> <sup>2-</sup> ]     |                                      | 13                 | 1.28  | 0.27  | 1.37   | 26             | 60.48   | 36.41   | 60.95   |
| nss-[Br <sup>-</sup> ]               |                                      | 11                 | 0.05  | 0.01  | 0.05   | 27             | 0.56    | 0.54    | 0.39    |
| nss-[SO <sub>4</sub> <sup>2-</sup> ] |                                      | 12                 | 0.97  | 0.19  | 0.96   | 26             | 58.02   | 35.58   | 54.43   |

Table S3. Statistical results for the ionic analysis of the 2019 snow samples at the Sea ice, Onshore, PEARL and OPAL sites. Note that the airborne samples were collected by the mounted tray above the ground (~1 m at OPAL and 11 m at PEARL). The units are  $\mu\text{M}$ .

|                                      | 2019     |       |       |        |         |        |        |        |           |         |         |         | Column average |         |         |        |    |        |       |        |
|--------------------------------------|----------|-------|-------|--------|---------|--------|--------|--------|-----------|---------|---------|---------|----------------|---------|---------|--------|----|--------|-------|--------|
|                                      | Airborne |       |       |        | 0-0.2cm |        |        |        | 0.2-0.5cm |         |         |         | 0.5-1.5cm      |         |         |        |    |        |       |        |
|                                      | n        | mean  | std   | median | n       | mean   | std    | median | n         | mean    | std     | median  | n              | mean    | std     | median | n  | mean   | std   | median |
| [Br <sup>-</sup> ]                   | 40       | 0.40  | 0.20  | 0.37   | 51      | 3.03   | 4.14   | 0.84   | 36        | 9.31    | 5.14    | 10.72   | 66             | 6.47    | 5.36    | 5.79   |    |        |       |        |
| [Cl <sup>-</sup> ]                   | 41       | 61.25 | 68.76 | 25.06  | 33      | 180.72 | 244.14 | 64.42  | 16        | 2887.67 | 2472.62 | 2718.74 | 33             | 1660.12 | 2080.86 | 510.54 |    |        |       |        |
| [Mg <sup>2+</sup> ]                  | 36       | 9.68  | 12.49 | 4.46   | 43      | 168.88 | 213.56 | 57.26  | 17        | 264.31  | 221.14  | 392.24  | 46             | 202.59  | 196.83  | 78.13  |    |        |       |        |
| [Na <sup>+</sup> ]                   | 38       | 29.52 | 32.25 | 14.98  | 34      | 149.80 | 197.82 | 43.99  | 12        | 1189.99 | 1470.62 | 320.53  | 19             | 390.39  | 304.56  | 382.34 |    |        |       |        |
| [NO <sub>3</sub> <sup>-</sup> ]      | 37       | 3.46  | 1.55  | 3.50   | 61      | 4.83   | 2.32   | 5.15   | 61        | 2.90    | 1.18    | 2.88    | 75             | 2.67    | 1.18    | 2.56   |    |        |       |        |
| [SO <sub>4</sub> <sup>2-</sup> ]     | 41       | 4.54  | 2.96  | 4.74   | 42      | 29.51  | 43.19  | 9.23   | 21        | 122.89  | 96.44   | 99.36   | 40             | 58.89   | 62.52   | 25.56  |    |        |       |        |
| nss-[Br <sup>-</sup> ]               | 39       | 0.35  | 0.20  | 0.34   | 32      | 0.24   | 0.19   | 0.29   | 8         | 0.58    | 0.77    | 0.20    | 17             | 0.22    | 0.18    | 0.14   |    |        |       |        |
| nss-[SO <sub>4</sub> <sup>2-</sup> ] | 39       | 2.52  | 1.53  | 2.89   | 28      | 1.85   | 2.73   | 1.24   | 8         | 3.12    | 3.01    | 2.42    | 19             | 1.54    | 2.67    | 0.69   |    |        |       |        |
| [Br <sup>-</sup> ]                   | 38       | 0.40  | 0.17  | 0.37   | 58      | 0.38   | 0.22   | 0.31   | 64        | 0.97    | 0.86    | 0.53    | 104            | 0.99    | 0.93    | 0.49   |    |        |       |        |
| [Cl <sup>-</sup> ]                   | 39       | 28.60 | 24.93 | 14.82  | 46      | 54.09  | 44.48  | 41.13  | 38        | 86.52   | 93.13   | 62.15   | 62             | 101.74  | 84.59   | 68.54  |    |        |       |        |
| [Mg <sup>2+</sup> ]                  | 31       | 1.79  | 1.95  | 0.70   | 56      | 31.53  | 43.17  | 8.80   | 62        | 51.75   | 52.64   | 9.76    | 102            | 52.30   | 51.99   | 21.94  |    |        |       |        |
| [Na <sup>+</sup> ]                   | 39       | 17.06 | 15.32 | 10.20  | 46      | 37.60  | 32.62  | 27.57  | 56        | 278.79  | 343.11  | 52.32   | 93             | 297.66  | 336.14  | 70.87  |    |        |       |        |
| [NO <sub>3</sub> <sup>-</sup> ]      | 36       | 3.76  | 1.99  | 3.58   | 61      | 3.84   | 2.18   | 3.67   | 63        | 3.41    | 1.52    | 4.16    | 101            | 3.06    | 1.53    | 3.19   |    |        |       |        |
| [SO <sub>4</sub> <sup>2-</sup> ]     | 42       | 4.11  | 2.41  | 4.38   | 51      | 6.06   | 4.86   | 5.01   | 64        | 14.67   | 11.49   | 8.61    | 104            | 14.98   | 11.47   | 11.49  |    |        |       |        |
| nss-[Br <sup>-</sup> ]               | 38       | 0.36  | 0.19  | 0.34   | 50      | 0.21   | 0.17   | 0.20   | 56        | 0.35    | 0.32    | 0.21    | 89             | 0.30    | 0.31    | 0.17   |    |        |       |        |
| nss-[SO <sub>4</sub> <sup>2-</sup> ] | 42       | 2.56  | 2.21  | 2.84   | 46      | 2.40   | 1.90   | 1.90   | 50        | -1.36   | 10.17   | 1.47    | 91             | -4.65   | 13.11   | 1.22   |    |        |       |        |
| [Br <sup>-</sup> ]                   | 21       | 0.35  | 0.18  | 0.39   | 31      | 0.30   | 0.12   | 0.31   | 32        | 0.22    | 0.10    | 0.17    | 28             | 0.19    | 0.05    | 0.18   | 32 | 0.19   | 0.05  | 0.18   |
| [Cl <sup>-</sup> ]                   | 19       | 26.82 | 12.14 | 22.87  | 33      | 17.71  | 6.54   | 18.59  | 57        | 120.88  | 115.60  | 47.27   | 58             | 127.37  | 88.05   | 52.73  | 66 | 117.73 | 85.33 | 51.17  |
| [Mg <sup>2+</sup> ]                  | 19       | 2.06  | 1.92  | 1.11   | 32      | 1.04   | 0.67   | 0.84   | 56        | 13.23   | 14.65   | 3.84    | 58             | 13.39   | 11.26   | 5.37   | 66 | 12.29  | 10.82 | 4.37   |
| [Na <sup>+</sup> ]                   | 19       | 19.86 | 9.75  | 17.65  | 34      | 11.80  | 5.20   | 10.84  | 56        | 85.49   | 79.83   | 36.53   | 58             | 93.06   | 63.96   | 43.03  | 66 | 87.62  | 61.60 | 40.15  |
| [NO <sub>3</sub> <sup>-</sup> ]      | 18       | 2.23  | 1.37  | 2.29   | 23      | 1.24   | 0.50   | 1.13   | 51        | 1.29    | 0.63    | 1.00    | 58             | 1.42    | 0.63    | 1.15   | 57 | 1.42   | 0.64  | 1.12   |
| [SO <sub>4</sub> <sup>2-</sup> ]     | 20       | 5.51  | 3.55  | 5.92   | 35      | 3.82   | 2.16   | 4.04   | 58        | 7.74    | 4.44    | 7.65    | 57             | 5.74    | 3.17    | 4.41   | 63 | 6.13   | 3.60  | 5.69   |
| nss-[Br <sup>-</sup> ]               | 21       | 0.28  | 0.20  | 0.23   | 31      | 0.28   | 0.12   | 0.29   | 33        | 0.00    | 0.13    | -0.03   | 31             | -0.05   | 0.08    | -0.07  | 34 | -0.05  | 0.08  | -0.07  |
| nss-[SO <sub>4</sub> <sup>2-</sup> ] | 22       | 4.63  | 4.24  | 4.55   | 36      | 3.19   | 2.20   | 3.46   | 56        | 2.32    | 2.24    | 2.05    | 56             | 0.01    | 1.53    | -0.10  | 58 | 0.18   | 1.74  | -0.10  |
| [Br <sup>-</sup> ]                   | 42       | 0.38  | 0.24  | 0.34   | 5       | 0.15   | 0.01   | 0.15   | 9         | 0.30    | 0.15    | 0.28    | 5              | 0.35    | 0.07    | 0.39   | 5  | 0.35   | 0.07  | 0.39   |
| [Cl <sup>-</sup> ]                   | 42       | 57.33 | 55.82 | 35.20  | 6       | 44.90  | 47.59  | 27.38  | 9         | 86.66   | 53.97   | 108.75  | 5              | 99.09   | 49.44   | 69.82  | 5  | 99.09  | 49.44 | 69.82  |
| [Mg <sup>2+</sup> ]                  | 38       | 6.13  | 6.48  | 4.00   | 3       | 9.11   | 5.68   | 7.80   | 9         | 9.77    | 7.56    | 13.16   | 5              | 11.80   | 7.26    | 7.71   | 5  | 11.80  | 7.26  | 7.71   |
| [Na <sup>+</sup> ]                   | 41       | 36.99 | 38.42 | 23.25  | 6       | 31.33  | 34.37  | 19.07  | 9         | 62.31   | 39.36   | 80.94   | 5              | 70.64   | 34.89   | 50.67  | 5  | 70.64  | 34.89 | 50.67  |
| [NO <sub>3</sub> <sup>-</sup> ]      | 40       | 3.41  | 2.05  | 2.81   | 3       | 0.96   | 0.21   | 0.91   | 8         | 2.16    | 1.07    | 1.82    | 5              | 2.02    | 0.23    | 2.07   | 5  | 2.02   | 0.23  | 2.07   |
| [SO <sub>4</sub> <sup>2-</sup> ]     | 45       | 5.47  | 3.61  | 4.31   | 6       | 2.45   | 1.95   | 2.00   | 9         | 5.06    | 3.69    | 5.58    | 5              | 6.14    | 0.52    | 5.98   | 5  | 6.14   | 0.52  | 5.98   |
| nss-[Br <sup>-</sup> ]               | 40       | 0.24  | 0.19  | 0.18   | 6       | 0.10   | 0.07   | 0.14   | 9         | 0.18    | 0.11    | 0.12    | 5              | 0.22    | 0.12    | 0.31   | 5  | 0.22   | 0.12  | 0.31   |
| nss-[SO <sub>4</sub> <sup>2-</sup> ] | 44       | 2.17  | 2.37  | 2.46   | 4       | 0.56   | 0.10   | 0.59   | 9         | 1.32    | 1.90    | 0.28    | 5              | 1.90    | 1.75    | 3.08   | 5  | 1.90   | 1.75  | 3.08   |

30 Table S4 Geographic heterogeneity of snow ions ( $\text{Na}^+$ ,  $\text{NO}_3^-$ ,  $\text{Br}^-$  and  $\text{nss}[\text{Br}^-]$ ) at each sampling site with snow samples randomly collected from a small area ( $2\text{m} \times 2\text{m}$ ) during two periods in 2019.

| Period                    | Sites   | Depth (cm) | $\text{Na}^+$ |        | $\text{NO}_3^-$ |      | $\text{Br}^-$ |      | $\text{nss-Br}^-$ |      |
|---------------------------|---------|------------|---------------|--------|-----------------|------|---------------|------|-------------------|------|
|                           |         |            | mean          | std    | mean            | std  | mean          | std  | mean              | std  |
| Feb 26-<br>Mar 3,<br>2019 | Sea ice | 0.0-0.5    | 129.33        | 148.65 | 4.27            | 1.74 | 0.67          | 0.74 | 0.43              | 0.48 |
|                           |         | 0.5-1.5    | 336.12        | 316.92 | 2.96            | 0.94 | 7.67          | 5.51 | 0.98              | 0.97 |
|                           | Onshore | 0.0-0.5    | 26.13         | 21.04  | 2.27            | 0.71 | 0.30          | 0.13 | 0.25              | 0.13 |
|                           |         | 0.5-1.5    | 581.53        | 315.89 | 3.62            | 1.01 | 3.87          | 3.76 | 0.67              | 0.29 |
|                           | PEARL   | 0.0-0.5    | 185.09        | 65.44  | 2.06            | 0.47 | 0.28          | 0.14 | -0.05             | 0.07 |
|                           |         | 0.5-1.5    | 150.87        | 30.09  | 2.00            | 0.38 | 0.25          | 0.10 | -0.02             | 0.08 |
| Mar 4 &<br>5, 2019        | Sea ice | 0-0.2      | -             | -      | 1.98            | 0.34 | 0.38          | 0.04 | -                 | -    |
|                           |         | 0.2-0.5    | 520.98        | 27.56  | 3.22            | 1.50 | 5.73          | 5.57 | 0.01              | 0.04 |
|                           |         | 0.5-1.5    | -             | -      | 1.77            | 0.19 | 12.91         | -    | -                 | -    |
|                           | Onshore | 0-0.2      | 32.39         | 0.64   | -               | -    | 0.12          | 0.00 | 0.06              | 0.00 |
|                           |         | 0.2-0.5    | 75.56         | 14.85  | 1.59            | 0.17 | 0.22          | 0.04 | 0.09              | 0.03 |
|                           |         | 0.5-1.5    | 49.31         | 9.41   | 1.92            | 0.58 | 0.23          | 0.02 | 0.14              | 0.03 |
|                           | 0PAL    | 0-0.2      | 71.22         | 25.51  | 1.19            | 0.00 | 0.14          | 0.02 | 0.01              | 0.03 |
|                           |         | 0.2-0.5    | 104.82        | 2.44   | 2.73            | 1.23 | 2.42          | 2.54 | 0.10              | 0.00 |
|                           |         | 0.5-1.5    | -             | -      | -               | -    | -             | -    | -                 | -    |

35 Table S5 Regression analyses (i.e., number of observations, standard error of slope ( $\mu\text{M}$ ), and  $p$ -values) for key linear models used in this study and associated with Figures 5, 6 and 7.

| Figures  | linear regressions                       | Sites   | Number of observations | Standard error of slope ( $\mu\text{M}$ ) | p-value    |
|----------|------------------------------------------|---------|------------------------|-------------------------------------------|------------|
| Figure 5 | (d) $[\text{Na}^+]$ vs time              | sea ice | 11                     | 0.65117                                   | 0.17666    |
|          |                                          | Onshore | 11                     | 1.3248                                    | 0.018913   |
|          |                                          | PEARL   | 2                      | -                                         | -          |
|          | (e) $[\text{NO}_3^-]$ vs time            | sea ice | 11                     | 0.031625                                  | 3.37E-05   |
|          |                                          | Onshore | 11                     | 0.07233                                   | 0.047092   |
|          |                                          | PEARL   | 2                      | -                                         | -          |
|          | (f) $[\text{Br}^-]$ vs time              | sea ice | 11                     | 0.0059219                                 | 0.31536    |
|          |                                          | Onshore | 11                     | 0.0058544                                 | 0.21431    |
|          |                                          | PEARL   | 2                      | 0                                         | -          |
|          | (g) nss- $[\text{Br}^-]$                 | sea ice | 11                     | 0.0054474                                 | 0.42219    |
|          |                                          | Onshore | 11                     | 0.0050932                                 | 0.8453     |
|          |                                          | PEARL   | 2                      | -                                         | -          |
| Figure 6 | (d) Tray $[\text{Na}^+]$ vs time         | PEARL   | 14                     | 1.6482                                    | 0.19785    |
|          |                                          | OPAL    | 24                     | 1.1562                                    | 0.47351    |
|          | (e) Tray $[\text{NO}_3^-]$ vs time       | PEARL   | 12                     | 0.06437                                   | 0.35704    |
|          |                                          | OPAL    | 24                     | 0.07293                                   | 0.024153   |
|          | (f) Tray $[\text{Br}^-]$ vs time         | PEARL   | 14                     | 0.0038572                                 | 0.00091149 |
|          |                                          | OPAL    | 24                     | 0.0057058                                 | 0.0010769  |
|          | (g) Tray nss- $[\text{Br}^-]$ vs time    | PEARL   | 14                     | 0.0056266                                 | 0.04216    |
|          |                                          | OPAL    | 24                     | 0.0058292                                 | 0.00069418 |
| Figure 7 | (a) 0-0.2cm $[\text{NO}_3^-]$ vs time    | Sea ice | 21                     | 0.10137                                   | 0.022069   |
|          |                                          | Onshore | 20                     | 0.12408                                   | 0.033649   |
|          |                                          | PEARL   | 13                     | 0.033592                                  | 0.63919    |
|          | (b) 0.2-0.5cm $[\text{NO}_3^-]$ vs time  | Sea ice | 22                     | 0.053913                                  | 0.00030065 |
|          |                                          | Onshore | 21                     | 0.062582                                  | 0.016509   |
|          |                                          | PEARL   | 18                     | 0.013772                                  | 0.24503    |
|          | (c) 0.5-1.5cm $[\text{NO}_3^-]$ vs time  | Sea ice | 29                     | 0.024566                                  | 0.027422   |
|          |                                          | Onshore | 27                     | 0.027371                                  | 0.0071189  |
|          |                                          | PEARL   | 26                     | 0.0081262                                 | 7.64E-07   |
|          | (d) 0-0.2cm nss- $[\text{Br}^-]$ vs time | Sea ice | 21                     | 0.0096136                                 | 0.019895   |

|                                 |         |    |           |           |
|---------------------------------|---------|----|-----------|-----------|
|                                 | Onshore | 20 | 0.0080688 | 0.010627  |
|                                 | PEARL   | 17 | 0.0035759 | 0.0048613 |
| (e) 0.2-0.5cm nss-[Br-] vs time | Sea ice | 12 | 0.012075  | 0.17789   |
|                                 | Onshore | 17 | 0.0088479 | 0.13183   |
|                                 | PEARL   | 10 | 0.0069285 | 0.035824  |
| (f) 0.5-1.5cm nss-[Br-] vs time | Sea ice | 4  | 0.05373   | 0.1602    |
|                                 | Onshore | 23 | 0.0070587 | 0.63092   |
|                                 | PEARL   | 13 | 0.0048105 | 0.9346    |

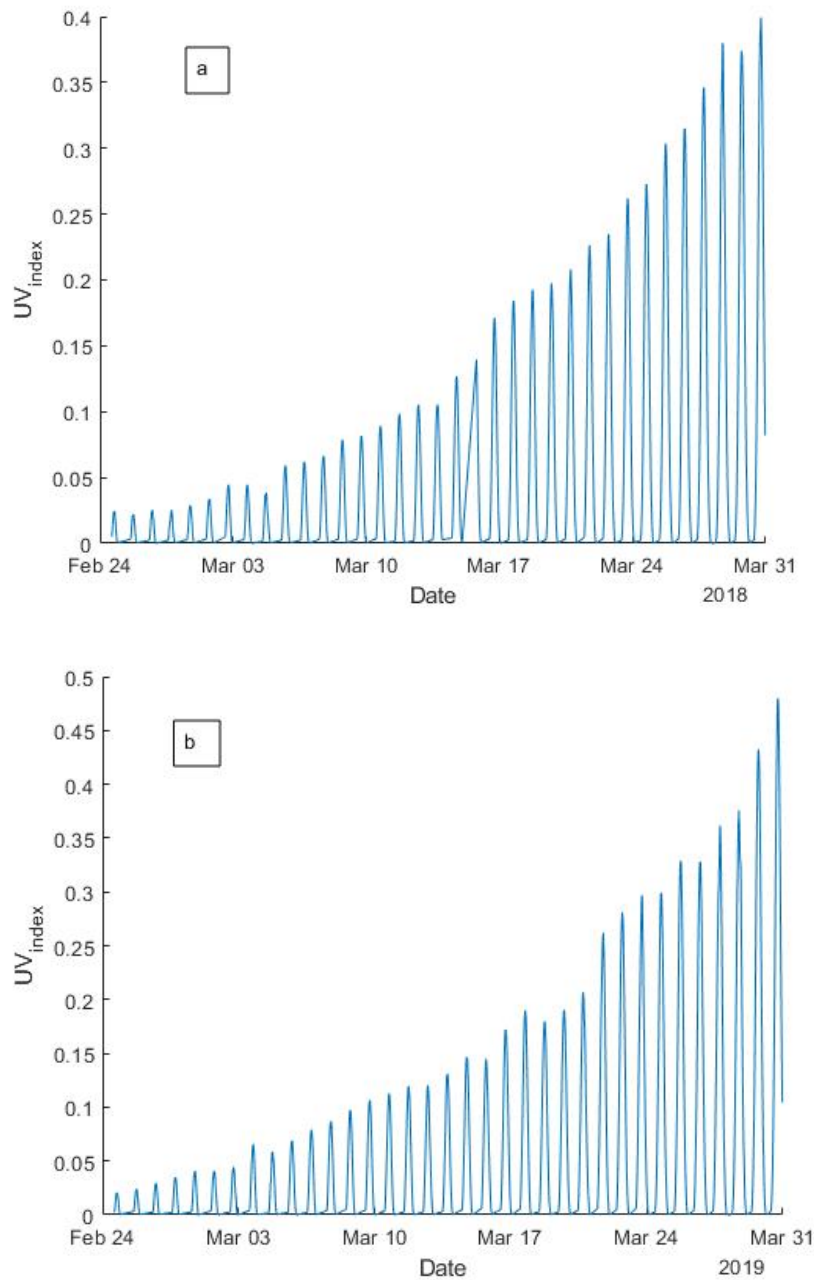

Figure S1. UV index at Eureka, Canada (79.989N, 85.934W, 8.7 m) during (a) March 24-31, 2018 and (b) March 24-31, 2019.

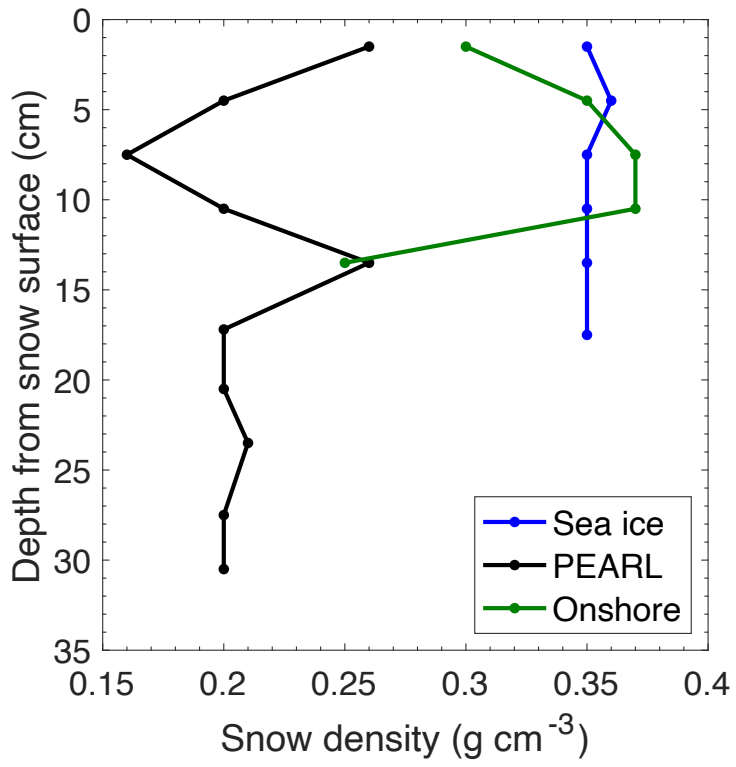

45

Figure S2. Snow density profiles measured in 2018 at the Sea ice, Onshore, and PEARL sampling sites (see Figure 1).



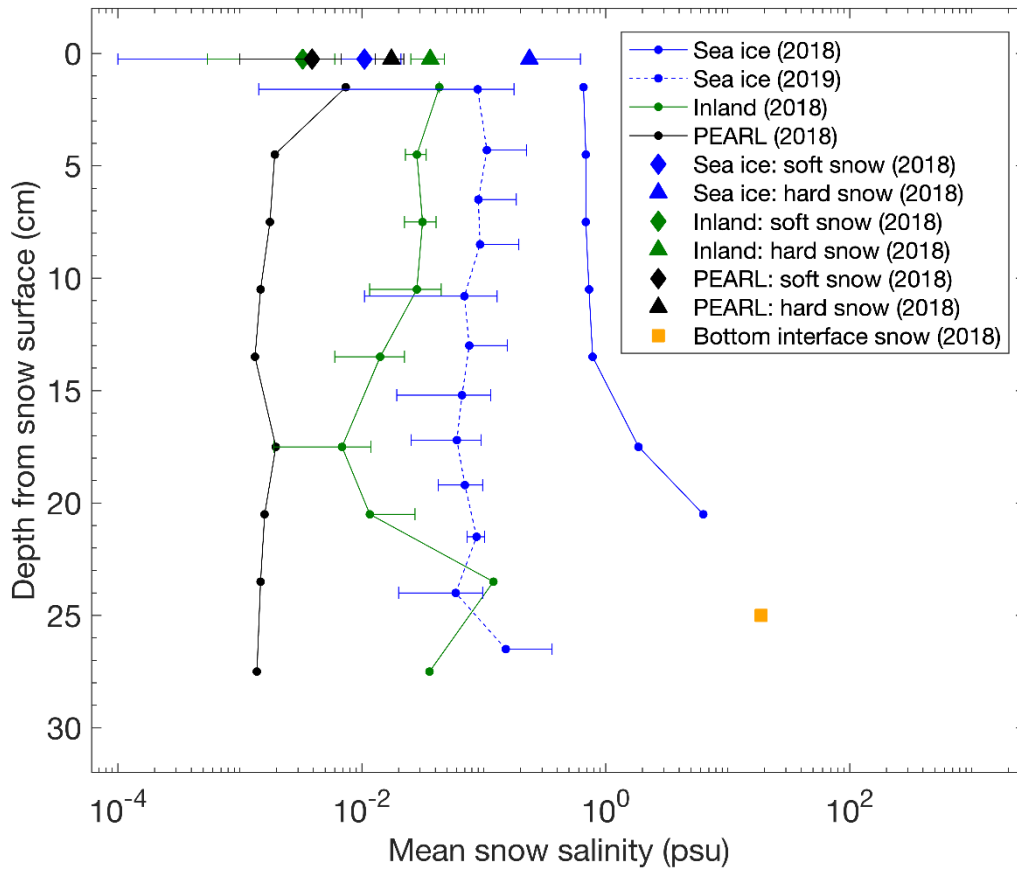

50 Figure S3. Snow salinity profiles in 2018 and 2019 samples. Top 0.5 cm snow sample mean salinities (collected in 2018) are plotted at a depth of 0.25 cm. At each site, two types of surface snow are collected: one is soft fluffy white colour snow and one is hard, light brown colour snow. The horizontal error bar represents one standard deviation value. 2019 sea ice profile includes only one column collected on Feb 27 at Sea ice site. 2018 inland profile includes two columns – one from Onshore and one from Creek site. The bottom interface snow-ice sample was collected on March 1 2018 at Sea ice site.

55

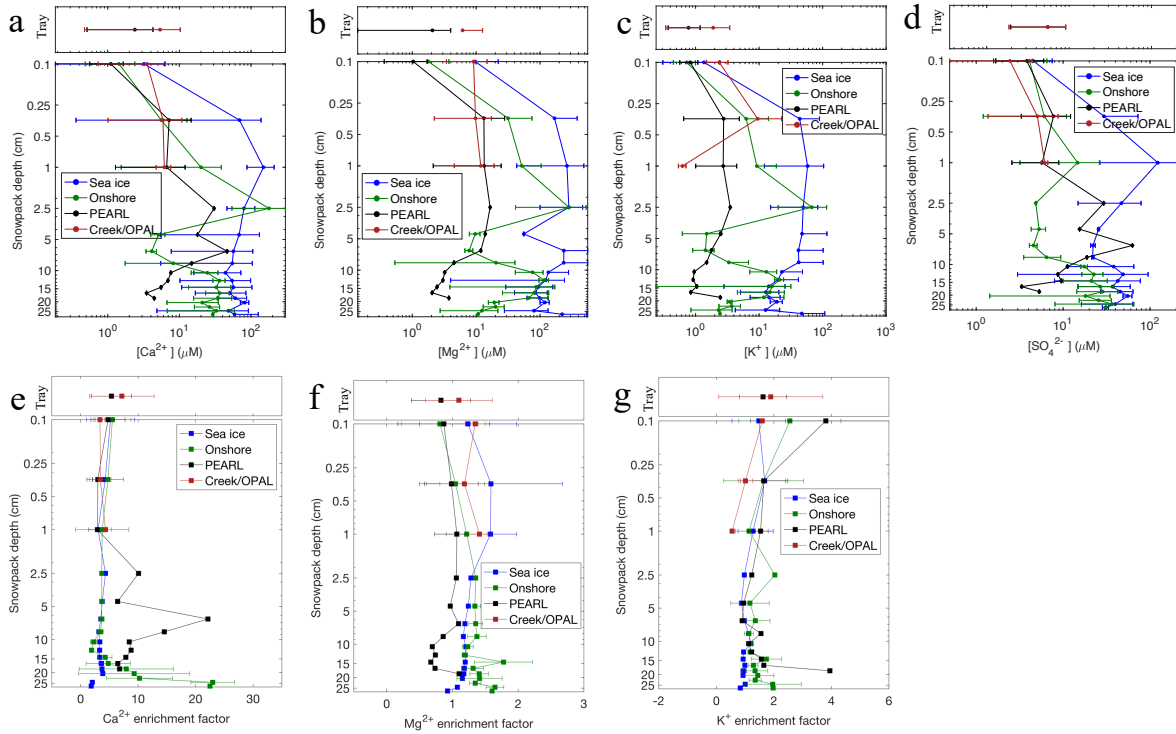

Figure S4. Vertical profiles of 2019 ions (a)  $[\text{Ca}^{2+}]$ , (b)  $[\text{Mg}^{2+}]$ , (c)  $[\text{K}^+]$ , (d)  $[\text{SO}_4^{2-}]$ , and enrichments of (e)  $[\text{Ca}^{2+}]$ , (f)  $[\text{Mg}^+]$ , and (g)  $[\text{K}^+]$  (see Section 3.2 for details).

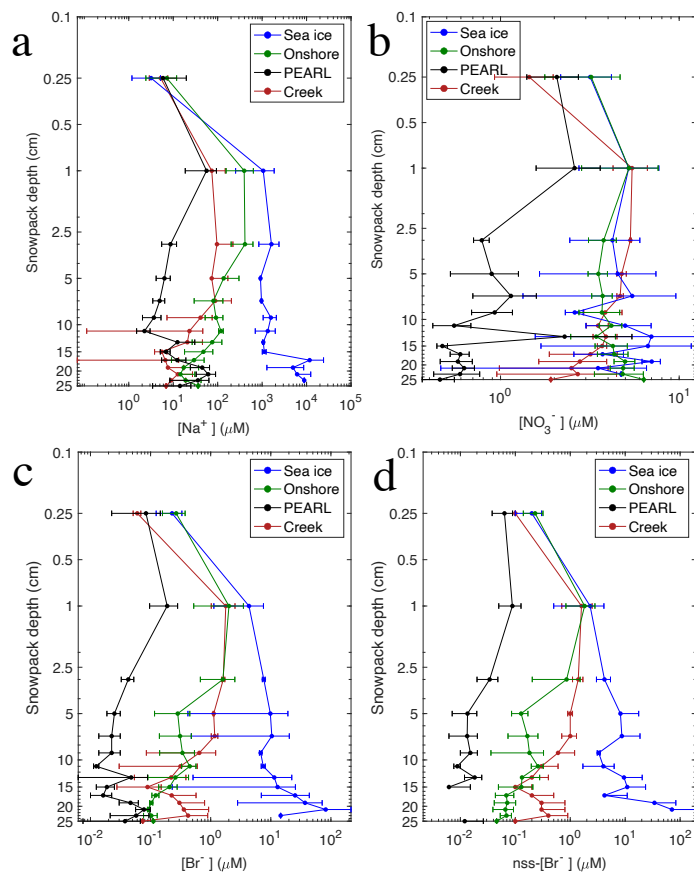

Figure S5. Vertical profiles of 2018 ions (a)  $[\text{Na}^+]$ , (b)  $[\text{NO}_3^-]$ , (c)  $[\text{Br}^-]$ , and (d)  $\text{nss}[\text{Br}^-]$ .

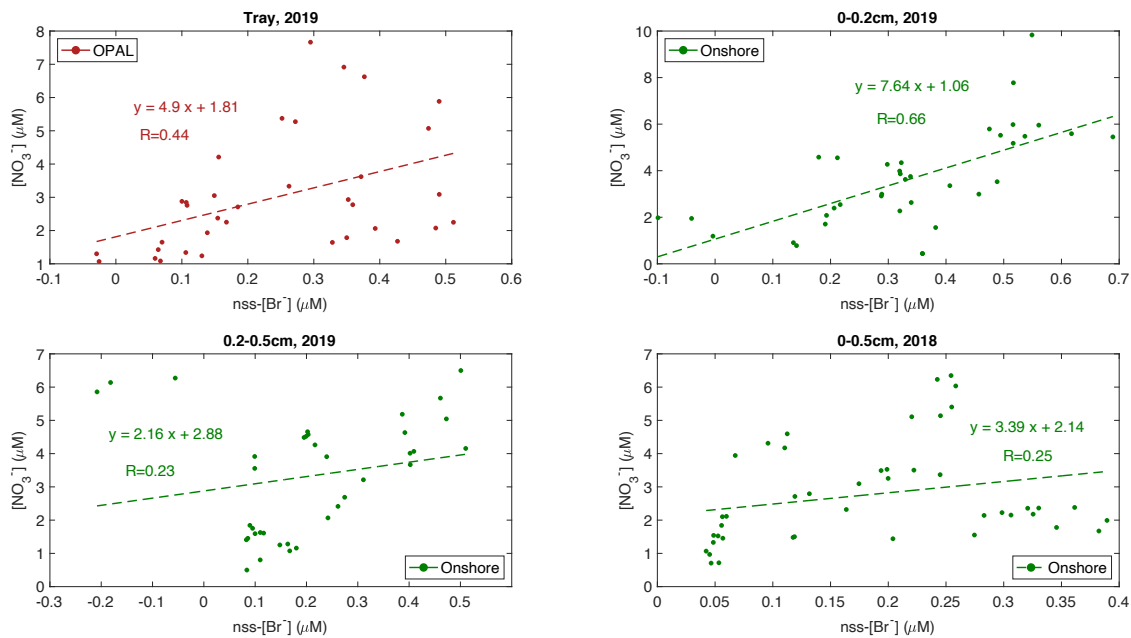

Figure S6. Same as Figure 7, except here nss[Br<sup>-</sup>] is used in the scatter plot and relationship analysis.
